# Supplementary material for: BTECH: A Platform to Integrate Genomic, Transcriptomic and Epigenomic Alterations in Brain Tumors
Source: Springer Nature journal article supplement (doi:10.1007/s12021-010-9091-9), 2011-01-05
Supplement: 12021_2010_9091_MOESM1_ESM.pdf [file 12021_2010_9091_MOESM1_ESM.pdf]

**Table S1: Data collection and processing procedures for public gene expression datasets in BTECH.**

| <b>Track Description</b>                        | <b>Data Resource</b> | <b>Title</b>                                                                                                       | <b>Platforms</b>    | <b>PubMed ID</b>    | <b>Analysis Procedures</b>                                                              |
|-------------------------------------------------|----------------------|--------------------------------------------------------------------------------------------------------------------|---------------------|---------------------|-----------------------------------------------------------------------------------------|
| Radial glia cells in ependymoma                 | Publication in 2006  | Radial glia cells are candidate stem cells of ependymoma                                                           | HG-U133Av2          | 16226707            | Extract from publication                                                                |
| Glial brain tumors_GSE2223                      | GSE2223              | Gene expression profiling in human glial brain tumors                                                              | DNA/cDNA microarray | 16204036 & 16365179 | Load onto GeneSpring GX software, normalize with per chip and per gene                  |
| Glioma cells (Hs683) exposed to Cadoxin_GSE1682 | GSE1682              | Global gene expression analysis of human glioma (Hs 683) cell lines exposed to cadoxin                             | HG-U133A            | 16309724            | Load onto GeneSpring GX software, log2 transform, normalize with per chip and per gene  |
| U87 glioblastoma cells_GSE1923                  | GSE1923              | Identification of PDGF-dependent patterns of gene expression in U87 glioblastoma cells                             | HG_U95Av2           | 15994924            | Load onto GeneSpring GX software, log2 transform, normalize with per chip and per gene  |
| Pseudopalisading cells in glioblastoma_GSE2485  | GSE2485              | Gene expression of pseudopalisading cells in human glioblastoma                                                    | HG-U133A            | 16254489            | Load onto GeneSpring GX software, log2 transform, normalize with per chip and per gene. |
| Gliomas_GSE2817                                 | GSE2817              | Wavelet modelling of microarray data provides chromosomal pattern of expression which predicts survival in gliomas | HG-U133plus2        | 17140431            | Per chip normalize to 50th percentile and per gene normalize to median                  |
| Gliomas_GSE4290                                 | GSE4290              | Expression data of glioma samples from Henry Ford Hospital                                                         | HG-U133plus2        | 16616334            | Load onto GeneSpring GX software, log2 transform, normalize with per chip and per gene  |
| Diffuse Infiltrating Gliomas_GSE4412            | GSE4412              | Gene expression profiling of gliomas strongly predicts survival                                                    | HG-U133set          | 15374961            | Load onto GeneSpring GX software, log2 transform, normalize with per chip and per gene  |

|                                                   |                                                                                                         |                                                                                                                   |                           |                     |                                                                                            |
|---------------------------------------------------|---------------------------------------------------------------------------------------------------------|-------------------------------------------------------------------------------------------------------------------|---------------------------|---------------------|--------------------------------------------------------------------------------------------|
| Gliomas cell lines and derived stem cells_GSE4536 | GSE4536                                                                                                 | Tumor stem cells more closely mirror the phenotype and genotype of primary human tumors than do cancer cell lines | HG-U133plus2              | 16697959            | Load onto GeneSpring GX software, log2 transform, normalize with per chip and per gene     |
| Meningiomas_GSE4780                               | GSE4780                                                                                                 | Expression profiling by array                                                                                     | HG-U133A and HG-U133plus2 | NA                  | Load onto GeneSpring GX software, log2 transform, and normalize with per chip and per gene |
| Glioblastomas Biopsy_GSE5107                      | GSE5107                                                                                                 | Distinct Transcription Profiles of Primary and Secondary Glioblastomas                                            | HG-U133A                  | 16966431            | Load onto GeneSpring GX software, log2 transform, and normalize with per chip and per gene |
| Pediatric Ependymoma_GSE16155                     | GSE16155                                                                                                | Expression data from ependymoma surgical samples                                                                  | HG-U133plus2              | 19917695            | Per chip normalize to 50th percentile and per sample normalize to median                   |
| Pediatric Ependymoma_GSE13267                     | GSE13267                                                                                                | Ependymoma gene expression analysis                                                                               | HG-U133Av2                | NA                  | Log2 transform, per chip normalize to 50th percentile, per gene normalize to median        |
| GNFAtlas2                                         | UCSC, released in 2004                                                                                  | A gene atlas of the mouse and human protein-encoding transcriptomes                                               | HG-U133A                  | 15075390            | Download from site                                                                         |
| CGAP_SAGE_Brain                                   | <a href="http://cgap.nci.nih.gov/">http://cgap.nci.nih.gov/</a> , released in 2001                      | Genome and genetic resources from the Cancer Genome Anatomy Project                                               | SAGE libraries            | 11257097            | Download from site                                                                         |
| GBM_The Cancer Genome Atlas_Gene Expression       | <a href="http://www.cancergenome.nih.gov/">http://www.cancergenome.nih.gov/</a> , released in Sept 2010 | The Cancer Genome Atlas                                                                                           | HG-U133A                  | Available from TCGA | Download from site                                                                         |
