# Supplementary material for: BTECH: A Platform to Integrate Genomic, Transcriptomic and Epigenomic Alterations in Brain Tumors
Source: Springer Nature journal article supplement (doi:10.1007/s12021-010-9091-9), 2011-01-05
Supplement: 12021_2010_9091_MOESM2_ESM.pdf [file 12021_2010_9091_MOESM2_ESM.pdf]

**Table S2: Data collection and processing procedures for public DNA methylation datasets in BTECH.**

| <b>Track Description</b>                      | <b>Data Resource</b>                                                                                                                  | <b>Title</b>                                                             | <b>Methods</b>                          | <b>PubMed ID</b>    | <b>Analysis Procedures</b>                            |
|-----------------------------------------------|---------------------------------------------------------------------------------------------------------------------------------------|--------------------------------------------------------------------------|-----------------------------------------|---------------------|-------------------------------------------------------|
| Brain methylation profile                     | <a href="http://transcriptome.affymetrix.com/download/DataMethPaper/">http://transcriptome.affymetrix.com/download/DataMethPaper/</a> | Microarray-based DNA methylation profiling: technology and applications. | Microarray hybridization                | 16428248            | Download and uplift to the current genome coordinates |
| Hypomethylated regions in adult normal brain  | Publication                                                                                                                           | Large-scale structure of genomic methylation patterns                    | Enzyme digestion followed by sequencing | 16365381            | Kindly provided by Dr. T.H. Bestor's group            |
| Hypermethylated regions in adult normal brain | Publication                                                                                                                           | Large-scale structure of genomic methylation patterns                    | Enzyme digestion followed by sequencing | 16365381            | Kindly provided by Dr. T.H. Bestor's group            |
| Human epigenome project                       | <a href="http://www.epigenome.org/">http://www.epigenome.org/</a>                                                                     | DNA methylation profiling of human chromosomes 6, 20 and 22.             | Bisulfite DNA sequencing                | 17072317            | Download from the HEP site                            |
| GBM_The Cancer Genome Atlas_Methylation       | <a href="http://www.cancergenome.nih.gov/">http://www.cancergenome.nih.gov/</a>                                                       | The Cancer Genome Atlas                                                  | HG-U133A                                | Available from TCGA | Download from site                                    |
| Astrocytomas_Hypomethylated_Regions           | <a href="http://www.ncbi.nlm.nih.gov/geo/query/acc.cgi?acc=GSE19391">http://www.ncbi.nlm.nih.gov/geo/query/acc.cgi?acc=GSE19391</a>   | CpG island hypermethylation in human astrocytomas                        | Microarray hybridization                | 20233874            | Download from the GEO site                            |
| Astrocytomas_CpG Island                       | <a href="http://www.ncbi.nlm.nih.gov/geo/query/acc.cgi?acc=GSE19391">http://www.ncbi.nlm.nih.gov/geo/query/acc.cgi?acc=GSE19391</a>   | CpG island hypermethylation in human astrocytomas                        | Microarray hybridization                | 20233874            | Download from the GEO site                            |

|                                             |             |                                                                   |                      |          |                          |
|---------------------------------------------|-------------|-------------------------------------------------------------------|----------------------|----------|--------------------------|
| Methylation Associated SNP Clusters (MASCs) | Publication | SNP-based Prediction of the Human Germ Cell Methylation Landscape | Computation analysis | 19442638 | Extract from publication |
| MAS Intensity                               | Publication | SNP-based Prediction of the Human Germ Cell Methylation Landscape | Computation analysis | 19442638 | Extract from publication |
