# Supplementary material for: BTECH: A Platform to Integrate Genomic, Transcriptomic and Epigenomic Alterations in Brain Tumors
Source: Springer Nature journal article supplement (doi:10.1007/s12021-010-9091-9), 2011-01-05
Supplement: 12021_2010_9091_MOESM3_ESM.pdf [file 12021_2010_9091_MOESM3_ESM.pdf]

**Table S3: Data collection and processing procedures for public chromosomal alterations datasets in BTECH.**

| <b>Track Description</b>                      | <b>Data Resource</b>   | <b>Title</b>                                                                                                                                   | <b>Methods</b> | <b>PubMed ID</b>           | <b>Analysis Procedures</b>  |
|-----------------------------------------------|------------------------|------------------------------------------------------------------------------------------------------------------------------------------------|----------------|----------------------------|-----------------------------|
| aCGH for Ependymomas (68 patients)            | GSE3435                | Identification of gains on 1q and epidermal growth factor receptor overexpression as independent prognostic markers in intracranial ependymoma | Array-CGH      | 16609018                   | Download from the GEO site  |
| Glial Brain Tumors_GSE1991                    | GSE1991                | High-resolution genome-wide mapping of genetic alterations in human glial brain tumors                                                         | Array-CGH      | 15899798                   | Download from the GEO site  |
| SNPchip_178Gliomas                            | Publication in 2006    | High-resolution global genomic survey of 178 gliomas reveals novel regions of copy number alteration and allelic imbalances                    | SNP chip       | 17018597                   | Extract from publication    |
| Neuroblastoma_LOH                             | Publication in 2005    | High-resolution detection and mapping of genomic DNA alterations in neuroblastoma                                                              | Array-CGH      | 15892104                   | Extract from publication    |
| Recombine_Rate (decode, Marshfield, Genethon) | UCSC, released in 2006 | Calculated sex-averaged rates of recombination                                                                                                 | Genetic maps   | 9718341, 8600387, 12053178 | Download from the UCSC site |
